# Supplementary material
Source: PubMed Central journal article supplement (PMC4432760)
Supplement: IAI.00303-15_zii999091254so1.pdf [file IAI.00303-15_zii999091254so1.pdf]

## SUPPLEMENTAL MATERIALS

### S1

#### Minimum Bactericidal Concentration (MBC) of LL-37

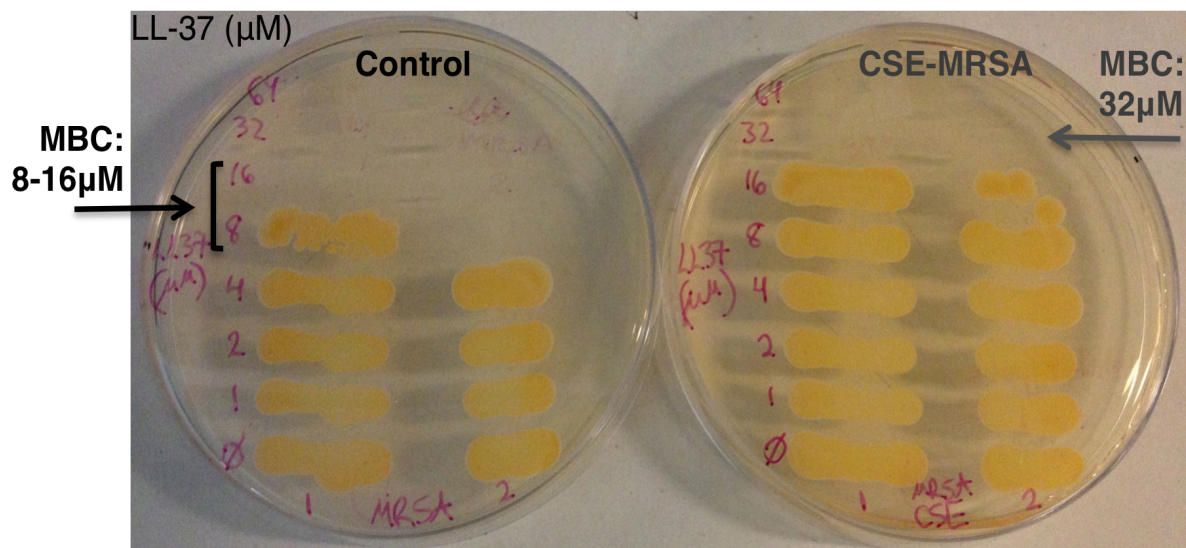

**Fig S1** MRSA exposed to CSE prior to incubation with human AMP LL-37 had a higher MBC compared to control MRSA (32 vs 8-16  $\mu\text{M}$ , respectively), as evidenced by live bacteria growing on THA plates after overnight incubation with LL-37.

### S2

| LL-37 assays: | MIC               | Metabolic activity inhibition | MBC              |
|---------------|-------------------|-------------------------------|------------------|
| control       | 4.3 $\mu\text{M}$ | 6 $\mu\text{M}$               | 12 $\mu\text{M}$ |
| CSE-MRSA      | 8 $\mu\text{M}$   | 16 $\mu\text{M}$              | 32 $\mu\text{M}$ |

**Table S2** Compared to control MRSA, CSE-MRSA were more resistant to LL-37 by MIC, metabolic activity, and MBC assays.

**S3**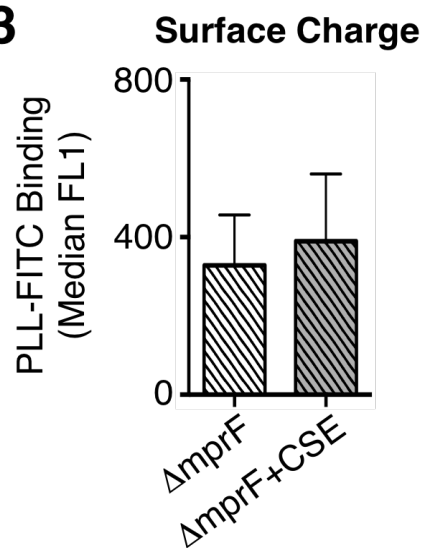

**Fig S3** *S. aureus* strain SA113 $\Delta mprF$ , in which *mprF* is knocked out, had no change in PLL-FITC binding after exposure to CSE.
